# Supplementary material for: Genome assembly and characterization of a complex zfBED-NLR gene-containing disease resistance locus in Carolina Gold Select rice with Nanopore sequencing
Source: PubMed Central journal article supplement (PMC7004385; doi:10.1371/journal.pgen.1008571), 2020-01-27
Supplement: pgen.1008571.s012.pdf [file pgen.1008571.s012.pdf]

**S1 Figure**

Dotplot comparison of the *Xo1* locus in Carolina Gold Select and Indica cultivar IR8

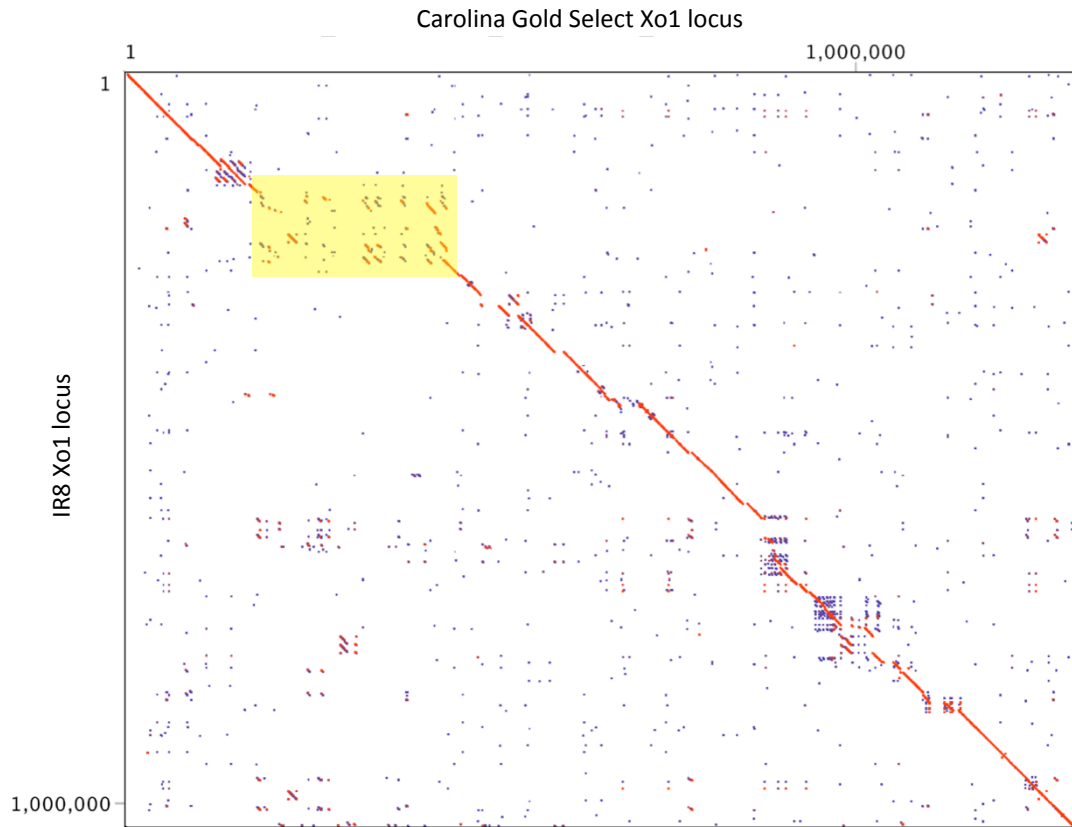

Dotplot comparison of the *Xo1* region of Carolina Gold Select (chr4 22729801..24027920) and indica cultivar IR8 (chr4 31657596..32688920). The yellow box highlights the insertion that is present in Carolina Gold Select and absent in IR8.
