# Supplementary material for: Genome assembly and characterization of a complex zfBED-NLR gene-containing disease resistance locus in Carolina Gold Select rice with Nanopore sequencing
Source: PubMed Central journal article supplement (PMC7004385; doi:10.1371/journal.pgen.1008571), 2020-01-27
Supplement: pgen.1008571.s014.pdf [file pgen.1008571.s014.pdf]

### S3 Figure

Maximum likelihood tree of NB-ARC domain from Oryzeae NLRs

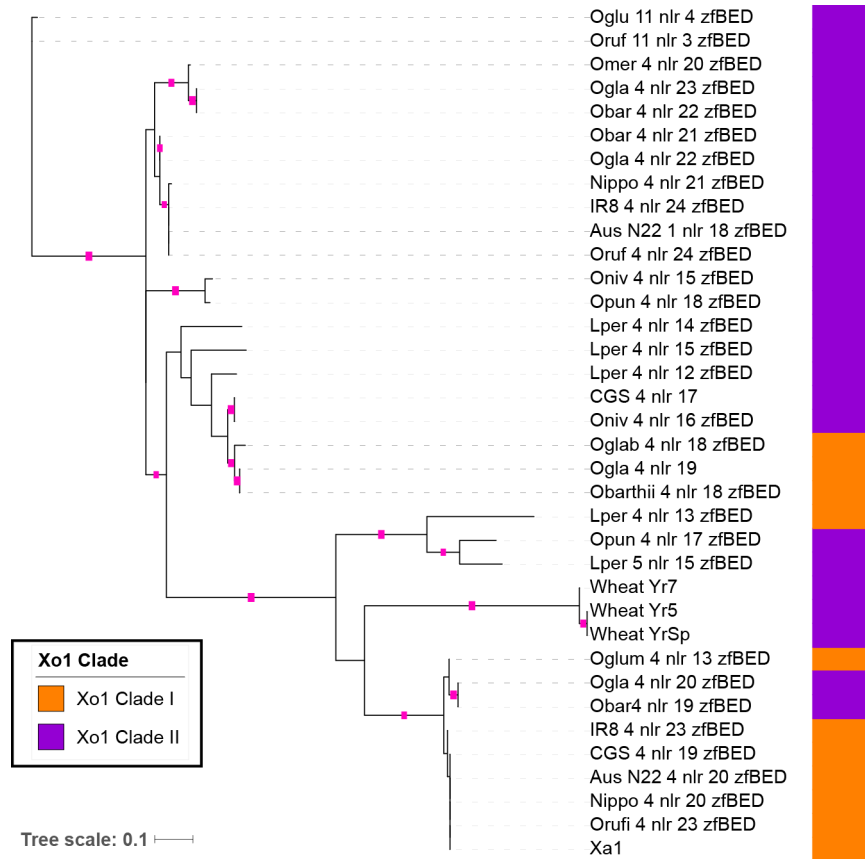

Maximum likelihood tree of zfBED domain nucleotide sequences from Xo1 clade I and II NLRs. Branches with bootstrap support greater than 80 percent are indicated with pink squares. Interactive tree available at <http://itol.embl.de/shared/acr242>.
